# Supplementary material
Source: PubMed Central journal article supplement (PMC6661846)
Supplement: TID-16-A7-s1.pdf [file TID-16-A7-s1.pdf]

**Supplemental Figure 1. Frequency of having noticed things that promote smoking in the last six months by country**

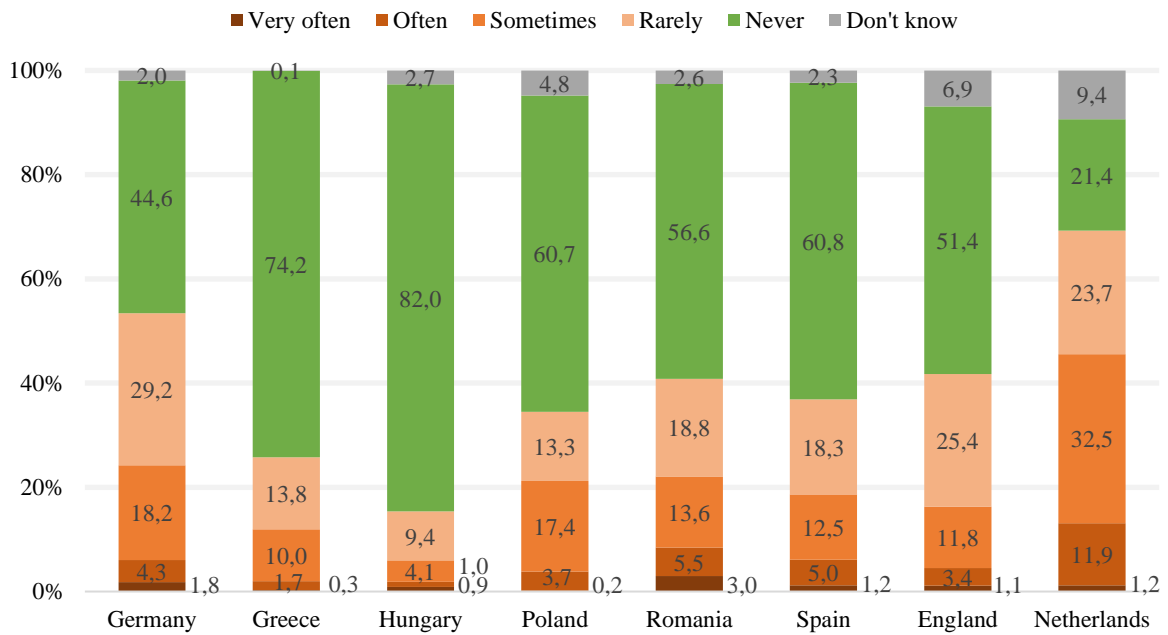

© 2019 Kahnert S.
